# Supplementary material
Source: publisher site journal article supplement (https://www.dovepress.com/article/470826)
Supplement: Supplementary file 1 [file get_supplementary_file.php]

**Supplementary Table S1: Quality assessment of included articles using CASP scoring**

| **Questions** | Did the study address a clearly issue? | Did the authors use an appropriate method to answer their questions? | Was the data collected from a clear and suitable source? | Were the controls selected in an acceptable way? | Did the authors dedicate a means to avoid bias? | Have the authors taken account of the potential confounding factors in the design and/or their analysis? | Are the results clear to the reader? | Are the results precise? | Is the model validated? | Is the results applicable to the general population? | Did the results fit with other available evidence? | Score out of 11 |
| --- | --- | --- | --- | --- | --- | --- | --- | --- | --- | --- | --- | --- |
| Jensen et al. (2017) [28] | Y | Y | Y | N | N | CT | Y | Y | CT | Y | Y | 7 |
| Ikushima et al. (2018) [33] | Y | Y | Y | Y | Y | CT | Y | Y | CT | Y | Y | 9 |
| Shi et al. (2021) [34] | Y | Y | Y | Y | Y | Y | Y | Y | CT | Y | Y | 10 |
| Kapitza et al. (2015) [35] | Y | Y | Y | N | N | CT | Y | Y | CT | N | CT | 5 |
| Blundell et al. (2017) [36] | Y | Y | Y | Y | Y | Y | Y | Y | CT | N | CT | 8 |
| Marbury et al. (2017) [37] | Y | Y | Y | CT | N | Y | Y | Y | CT | CT | Y | 7 |
| Jensen et al. (2018) [29] | Y | Y | Y | CT | N | CT | Y | Y | CT | CT | Y | 6 |
| Enebo et al. (2021) [38] | Y | Y | Y | Y | Y | Y | Y | Y | CT | N | CT | 8 |
| Granhall et al. (2019) [39] | Y | Y | Y | Y | Y | CT | Y | Y | CT | Y | Y | 9 |
| Bækdal et al. (2021a) [40] | Y | Y | Y | CT | CT | CT | Y | Y | CT | Y | Y | 7 |
| Bækdal et al. (2021b) [41] | Y | Y | Y | CT | N | CT | Y | Y | CT | Y | Y | 7 |
| Hauge et al. (2021) [42] | Y | Y | Y | N | CT | Y | Y | Y | CT | Y | Y | 8 |
| van Hout et al. (2023) [43] | Y | Y | Y | CT | CT | Y | Y | Y | CT | Y | Y | 8 |
| Bækdal et al. (2018a) [44] | Y | Y | Y | CT | N | Y | Y | Y | CT | CT | Y | 7 |
| Granhall et al. (2018) [45] | Y | Y | Y | CT | N | Y | Y | Y | CT | Y | Y | 8 |
| Meier et al. (2022) [46] | Y | Y | Y | CT | N | Y | Y | Y | CT | N | Y | 7 |
| Bækdal et al. (2018b) [47] | Y | Y | Y | CT | N | Y | Y | Y | CT | Y | Y | 8 |

Y=Yes, N=No, CT=Can't tell
